# Supplementary material for: The simultaneous removal of heavy metals and organic contaminants over a Bi2WO6/mesoporous TiO2 nanotube composite photocatalyst
Source: Royal Society of Chemistry journal article supplement (doi:10.1039/d0ra03430d), 2020-01-01
Supplement: d0ra03430d1.pdf [file d0ra03430d1.pdf]

## Supplementary Material

### Simultaneous Removal of Heavy Metals and Organic Contaminants over Bi<sub>2</sub>WO<sub>6</sub>/Mesoporous TiO<sub>2</sub> Nanotube Composite Photocatalyst

Lei Cheng <sup>a</sup>, Sijia Liu <sup>a</sup>, Guangying He <sup>a</sup>, Yun Hu <sup>\* a,b,c</sup>

<sup>a</sup> *School of Environment and Energy, South China University of Technology, Guangzhou  
510006, P. R. China*

<sup>b</sup> *Guangdong Provincial Key Laboratory of Atmospheric Environment and Pollution  
Control, Guangzhou 510006, P. R. China*

<sup>c</sup> *The Key Lab of Pollution Control and Ecosystem Restoration in Industry Clusters,  
Guangzhou, Ministry of Education, Guangzhou 510006, P. R. China*

\*Corresponding author. *Phone:* +86-020-3938-0573, *E-mail:* huyun@scut.edu.cn

## Details of experimental section

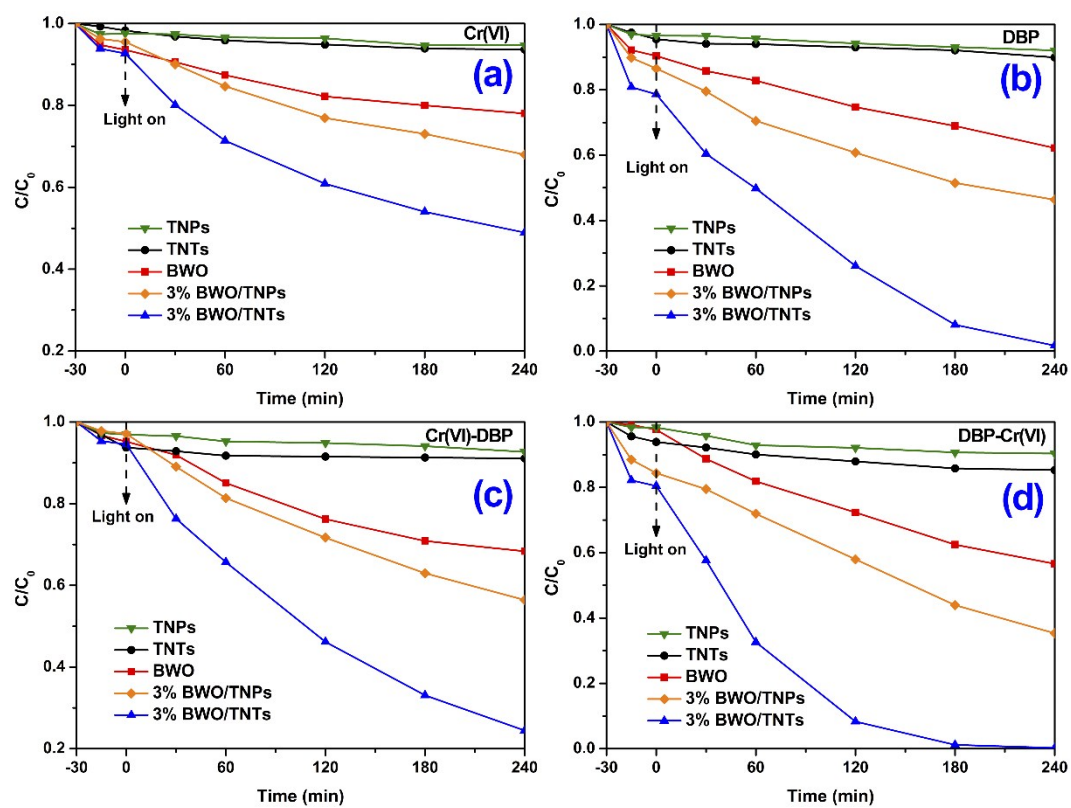

**Fig. S1.** Photocatalytic removal of (a) Cr(VI), (b) DBP from only single pollutant solutions and (c) Cr(VI), (d) DBP from Cr(VI)-DBP mixed solution on the catalysts with different morphology under visible light irradiation..

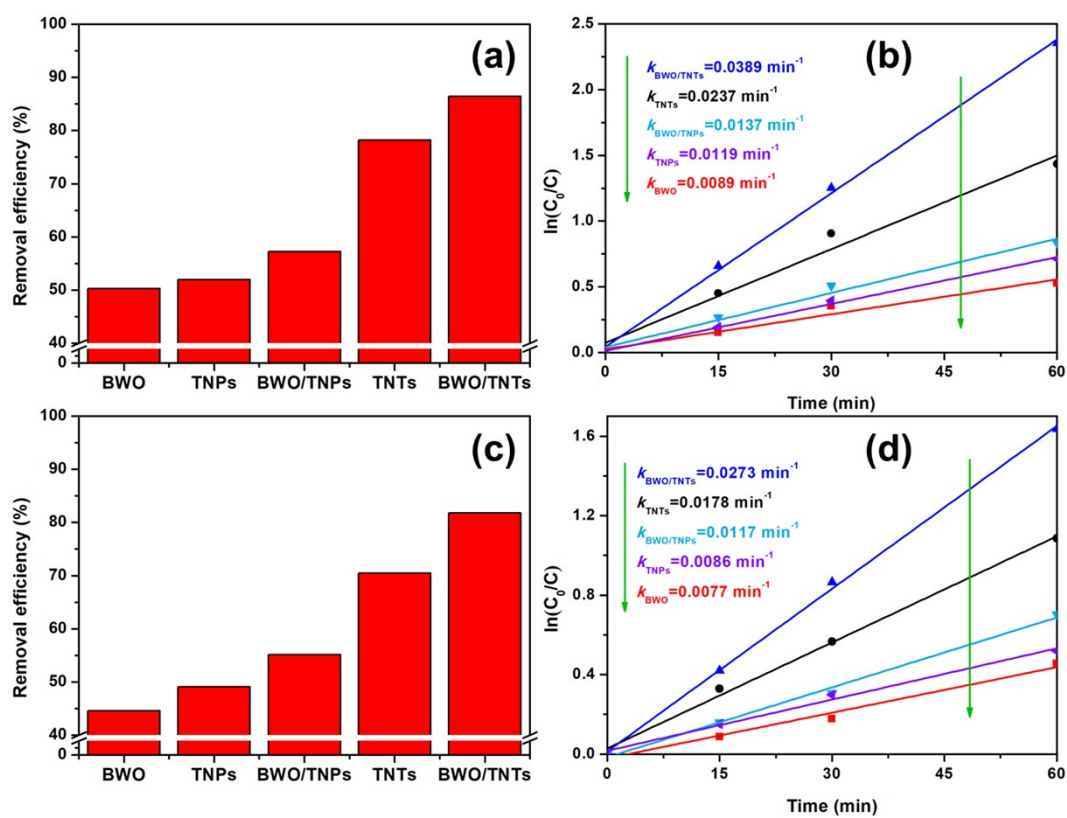

**Fig. S2.** Removal efficiency and linear fit log plots of Cr(VI) (a, b) and DBP (c, d) from mixed pollutants on different catalysts under UV light irradiation.

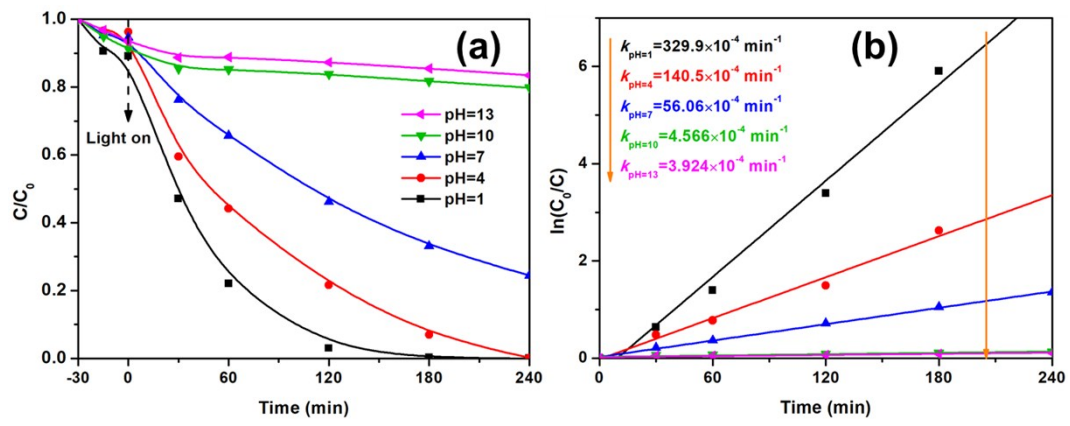

**Fig. S3.** Removal of Cr(VI) on 3%BWO/TNTs from mixed pollutants (a) and linear fit log plots (b).

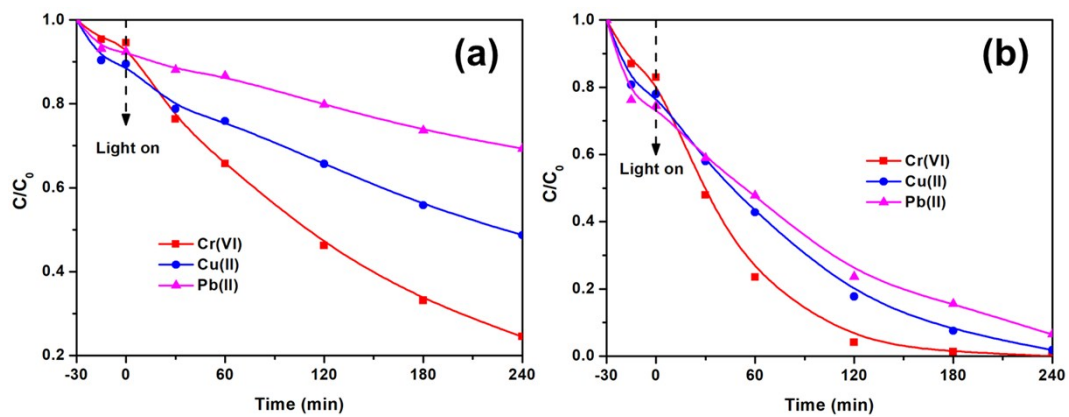

**Fig. S4.** Removal of (a) heavy metals and (b) DBP on 3%BWO/TNTs from different mixed pollutants.

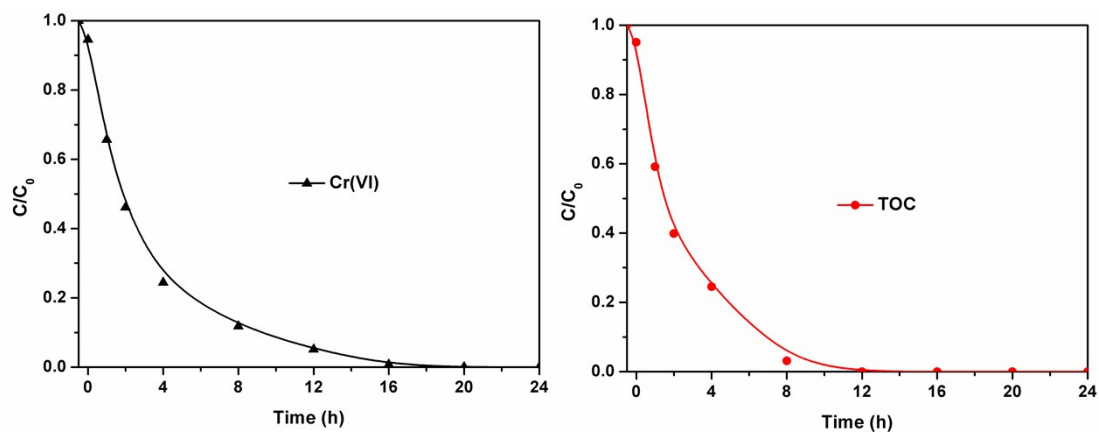

**Fig. S5.** Removal of (a) Cr(VI) and (b) TOC from Cr(VI)-DBP mixed pollutants on 3%BWO/TNTs under visible light irradiation.

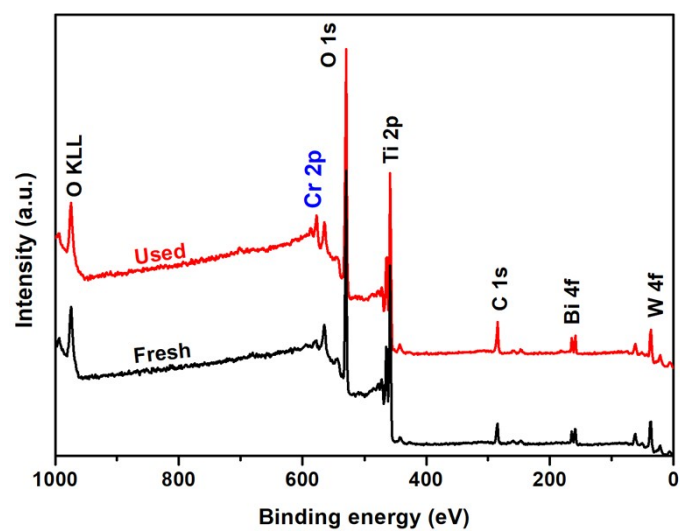

**Fig. S6.** Survey XPS spectra of the fresh and the used 3%BWO/TNTs.

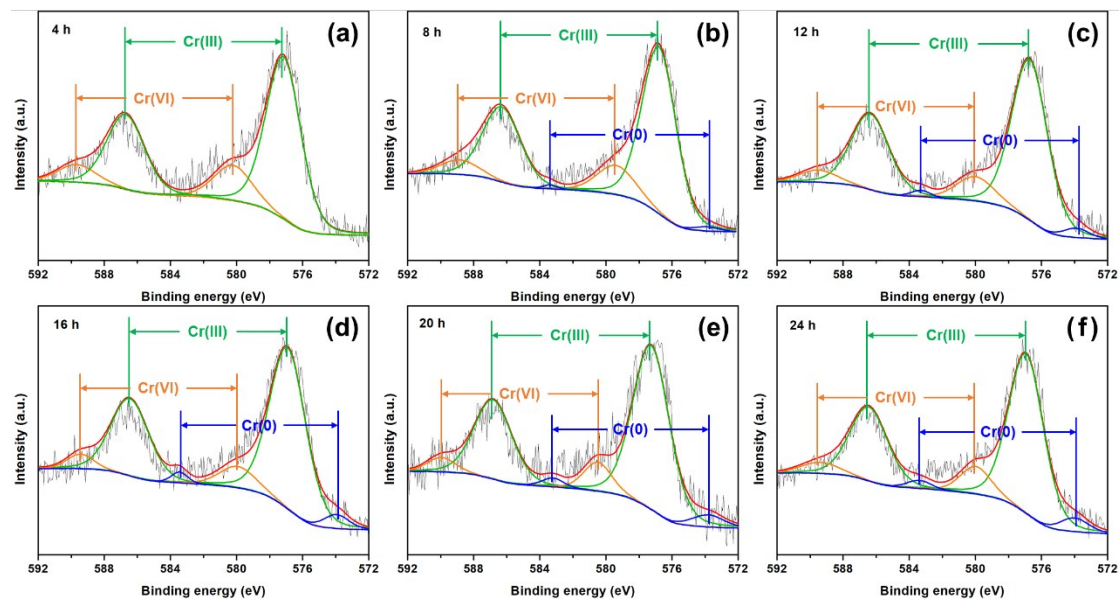

**Fig. S7.** High-resolution XPS spectra of Cr 2p for the 3%BWO/TNTs after reaction for different time: (a) 4 h; (b) 8 h; (c) 12 h; (d) 16 h; (e) 20 h; (f) 24 h
